# Supplementary material
Source: PubMed Central journal article supplement (PMC7146852)
Supplement: la9b03532_si_001.pdf [file la9b03532_si_001.pdf]

## **Supporting Information for**

### **Bulk nanobubbles or not nanobubbles: that is the question**

**Ananda J. Jadhav, Mostafa Barigou**✉

School of Chemical Engineering, University of Birmingham, Edgbaston, Birmingham B15 2TT, United Kingdom

Pages: 11

Figures: 7

Tables: 3

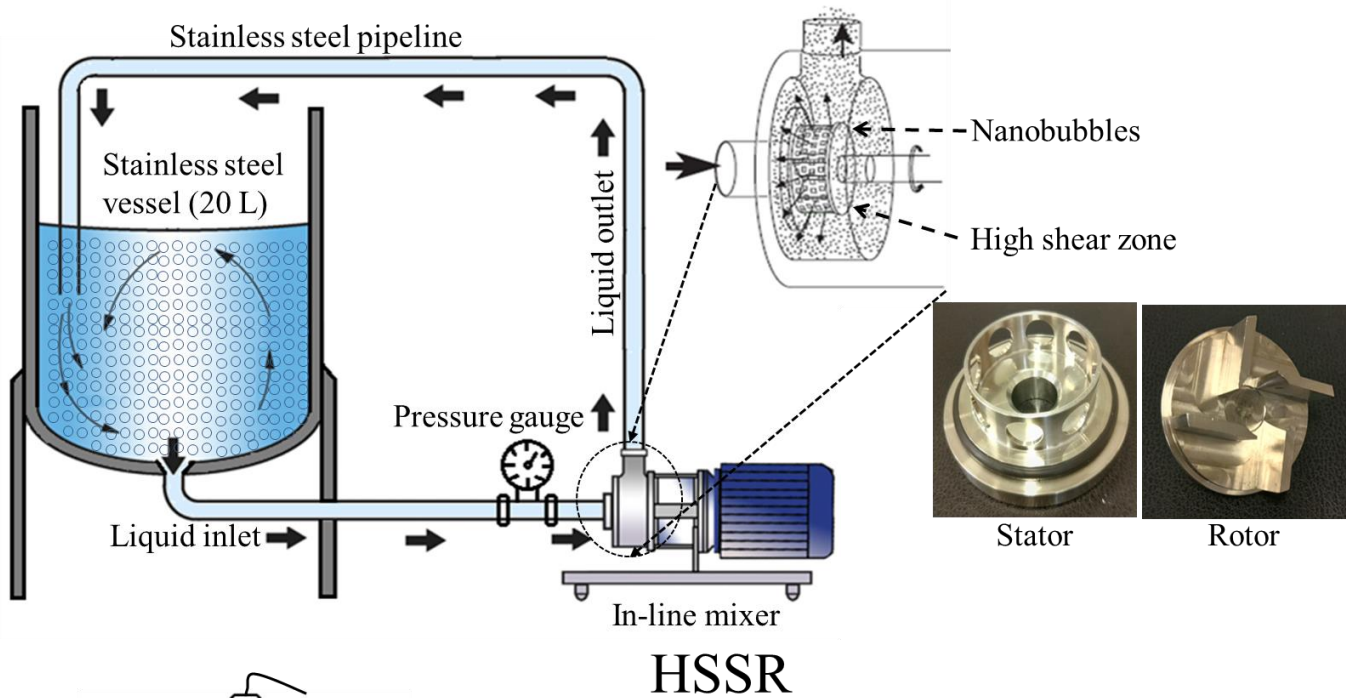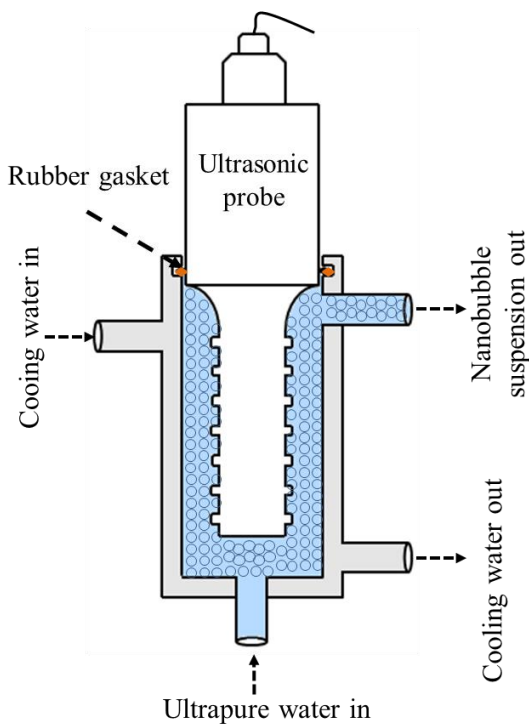

**Acoustic cavitation**

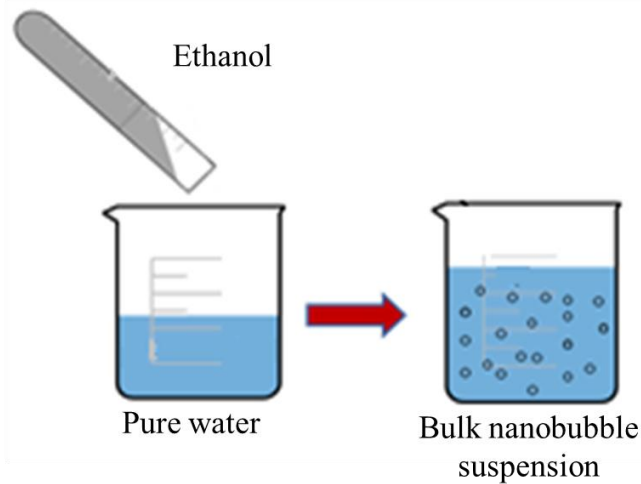

**Ethanol–water mixing**

Figure S1. Schematic illustration of the (A) continuous high-shear rotor-stator device; (B) acoustic cavitation setup; (C) water-ethanol mixing process.

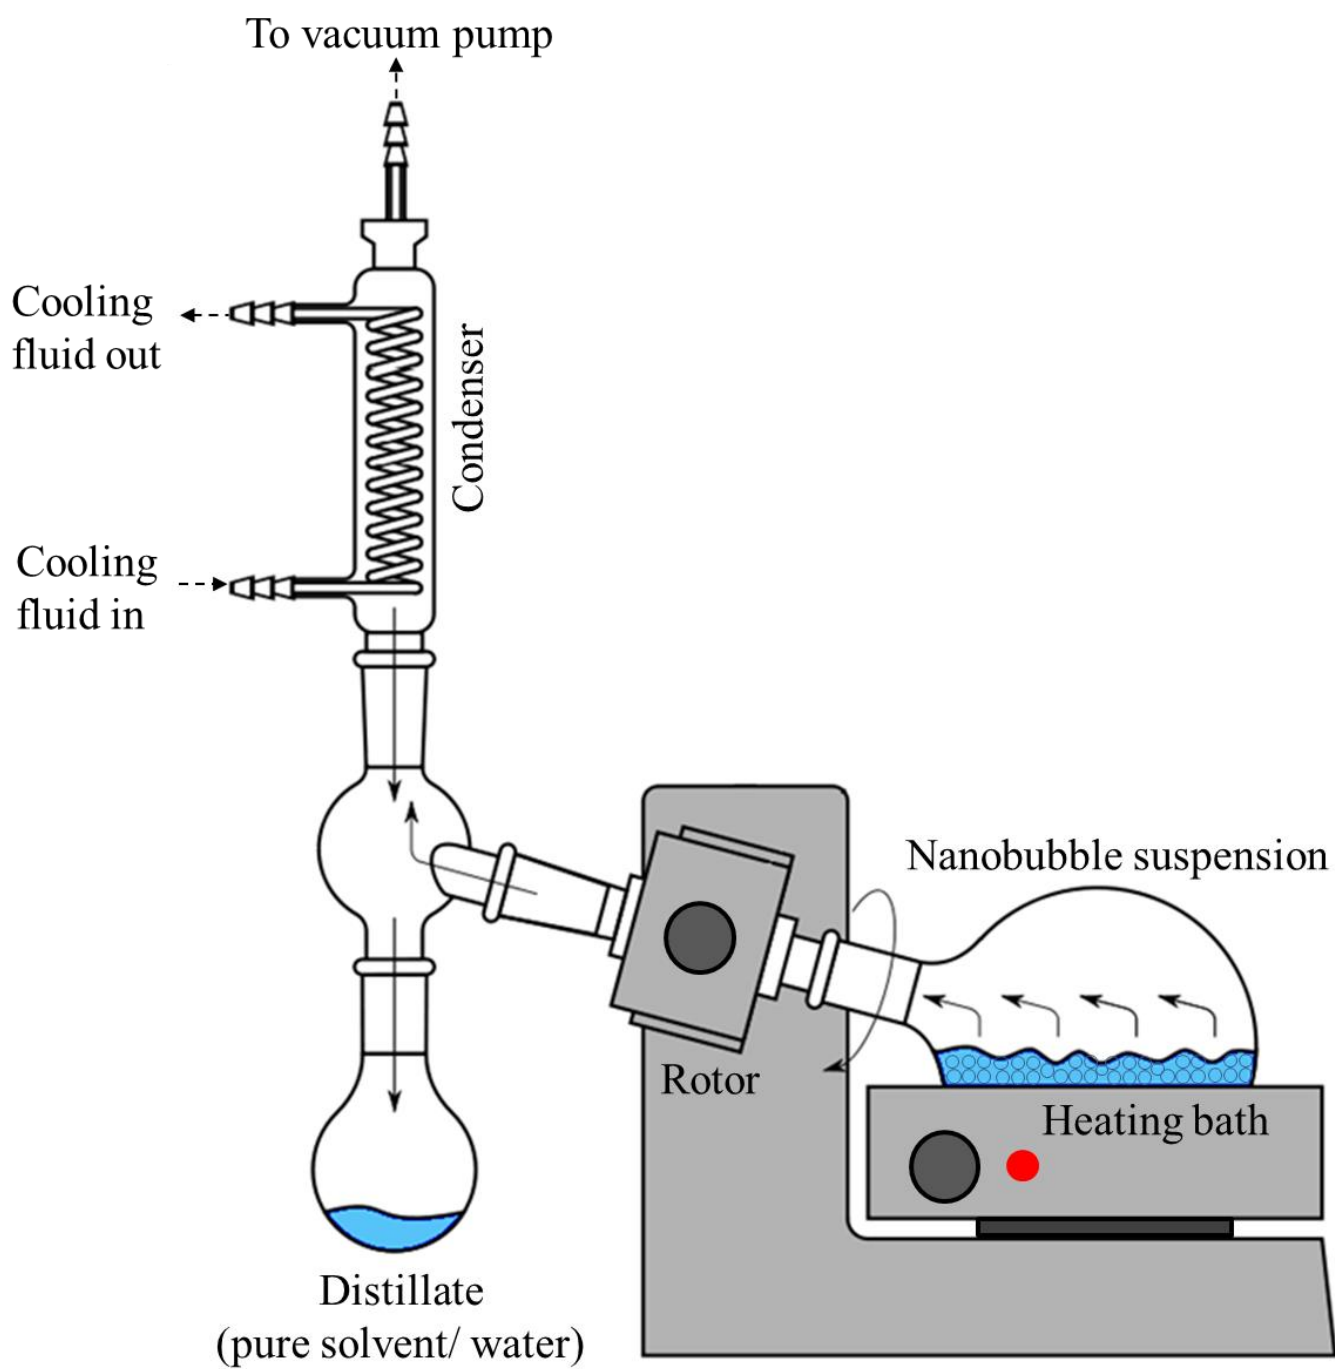

Figure S2. Schematic of vacuum rotary evaporator experiments.

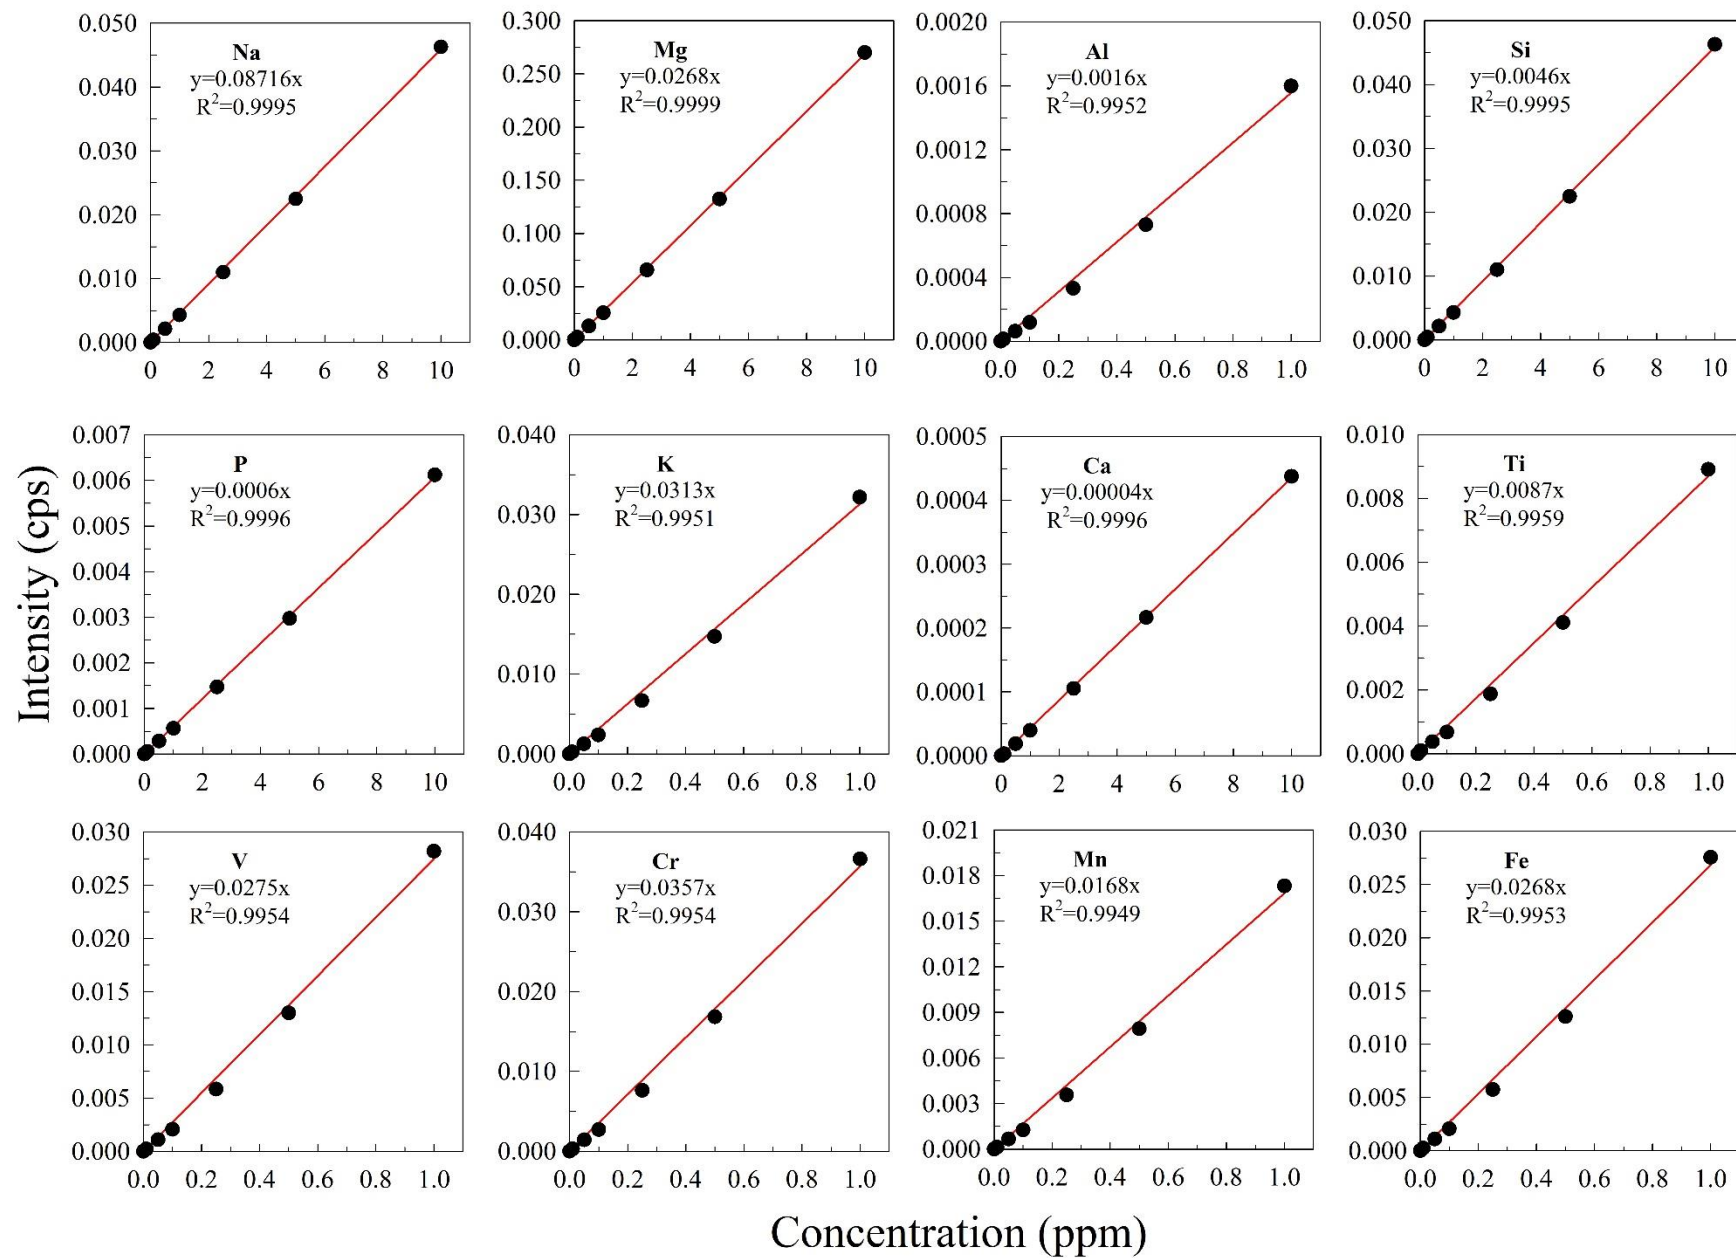

Figure S3. Calibration curves for individual elements (Na, Mg, Al, Si, P, K, Ca, Ti, V, Cr, Mn, Fe) measured by ICP-MS with solution-based calibration (standard additions mode).

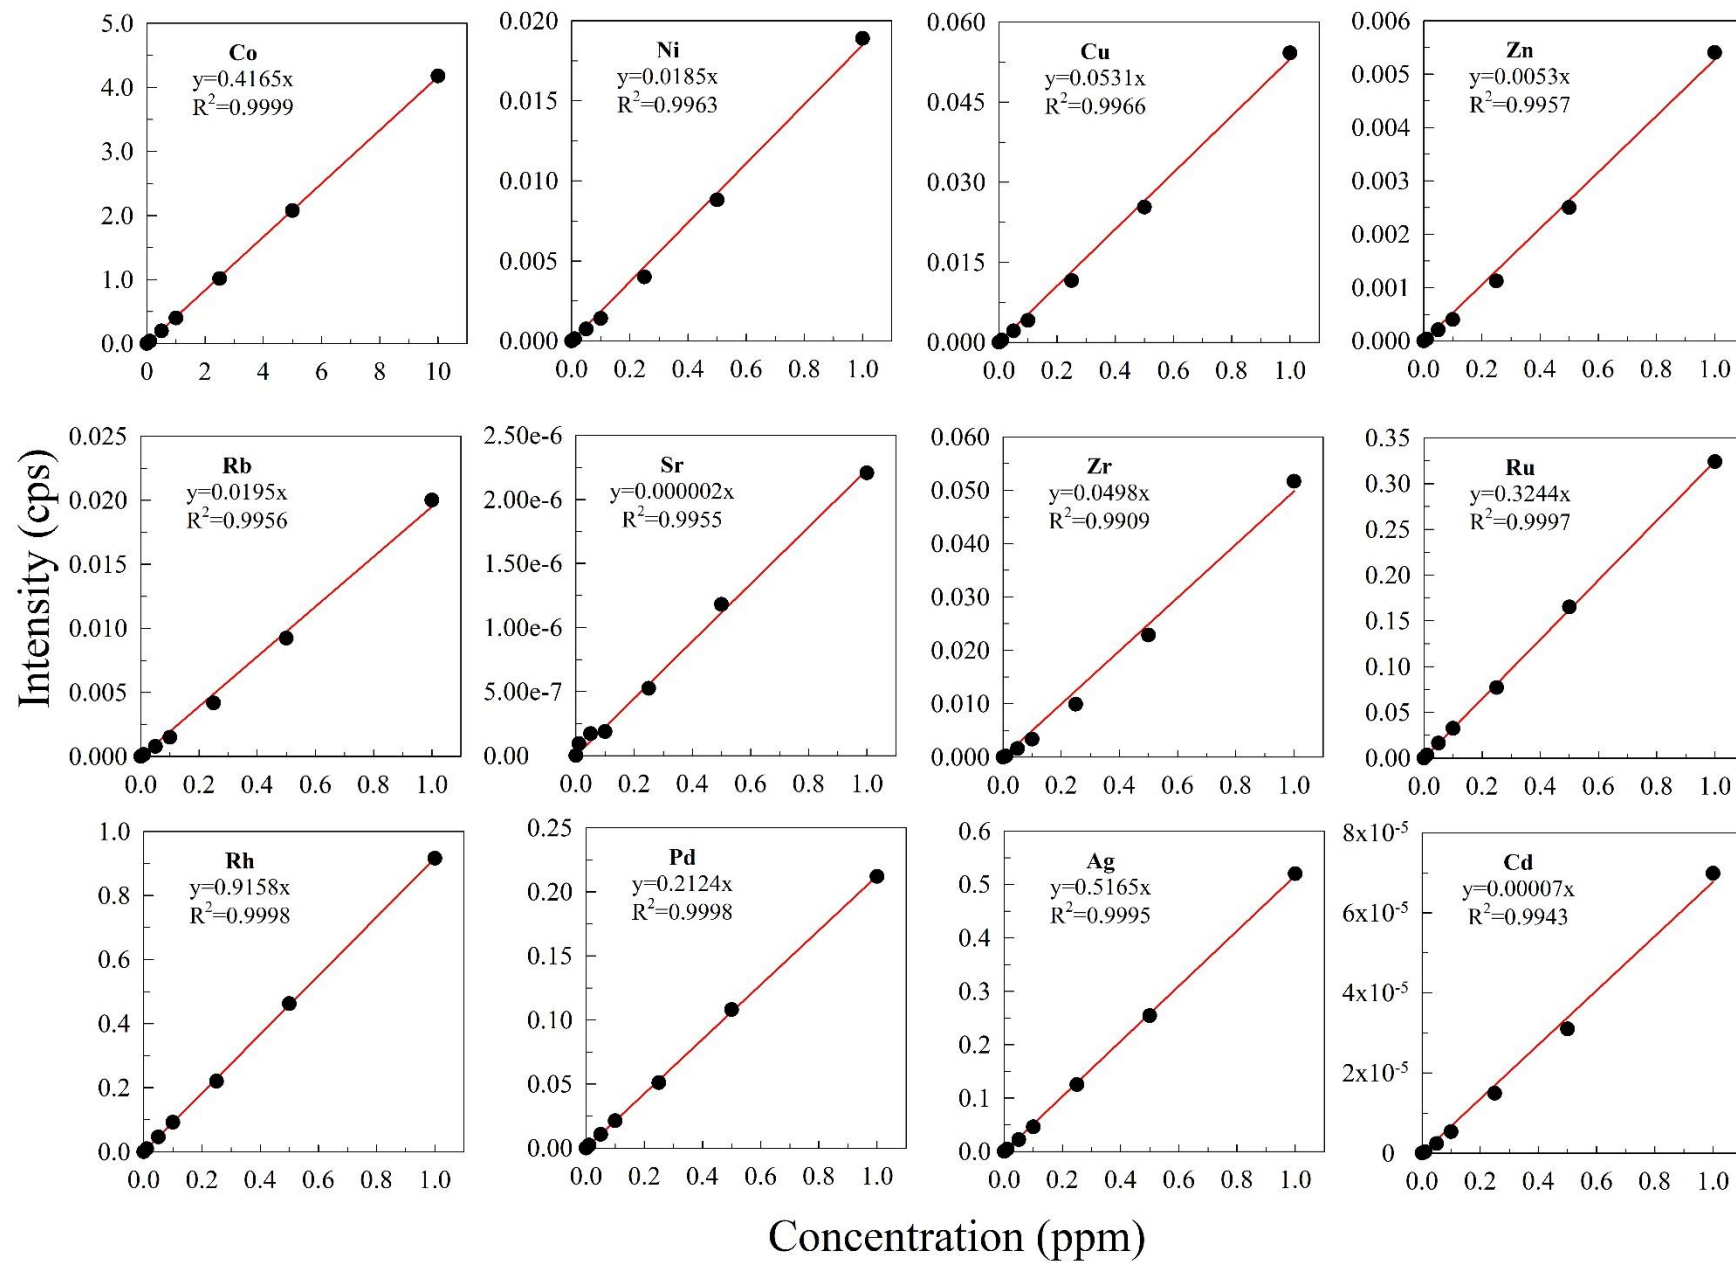

Figure S4. Calibration curves for individual elements (Co, Ni, Cu, Zn, Rb, Sr, Zr, Ru, Rh, Pd, Ag, Cd) measured by ICP-MS with solution-based calibration (standard additions mode).

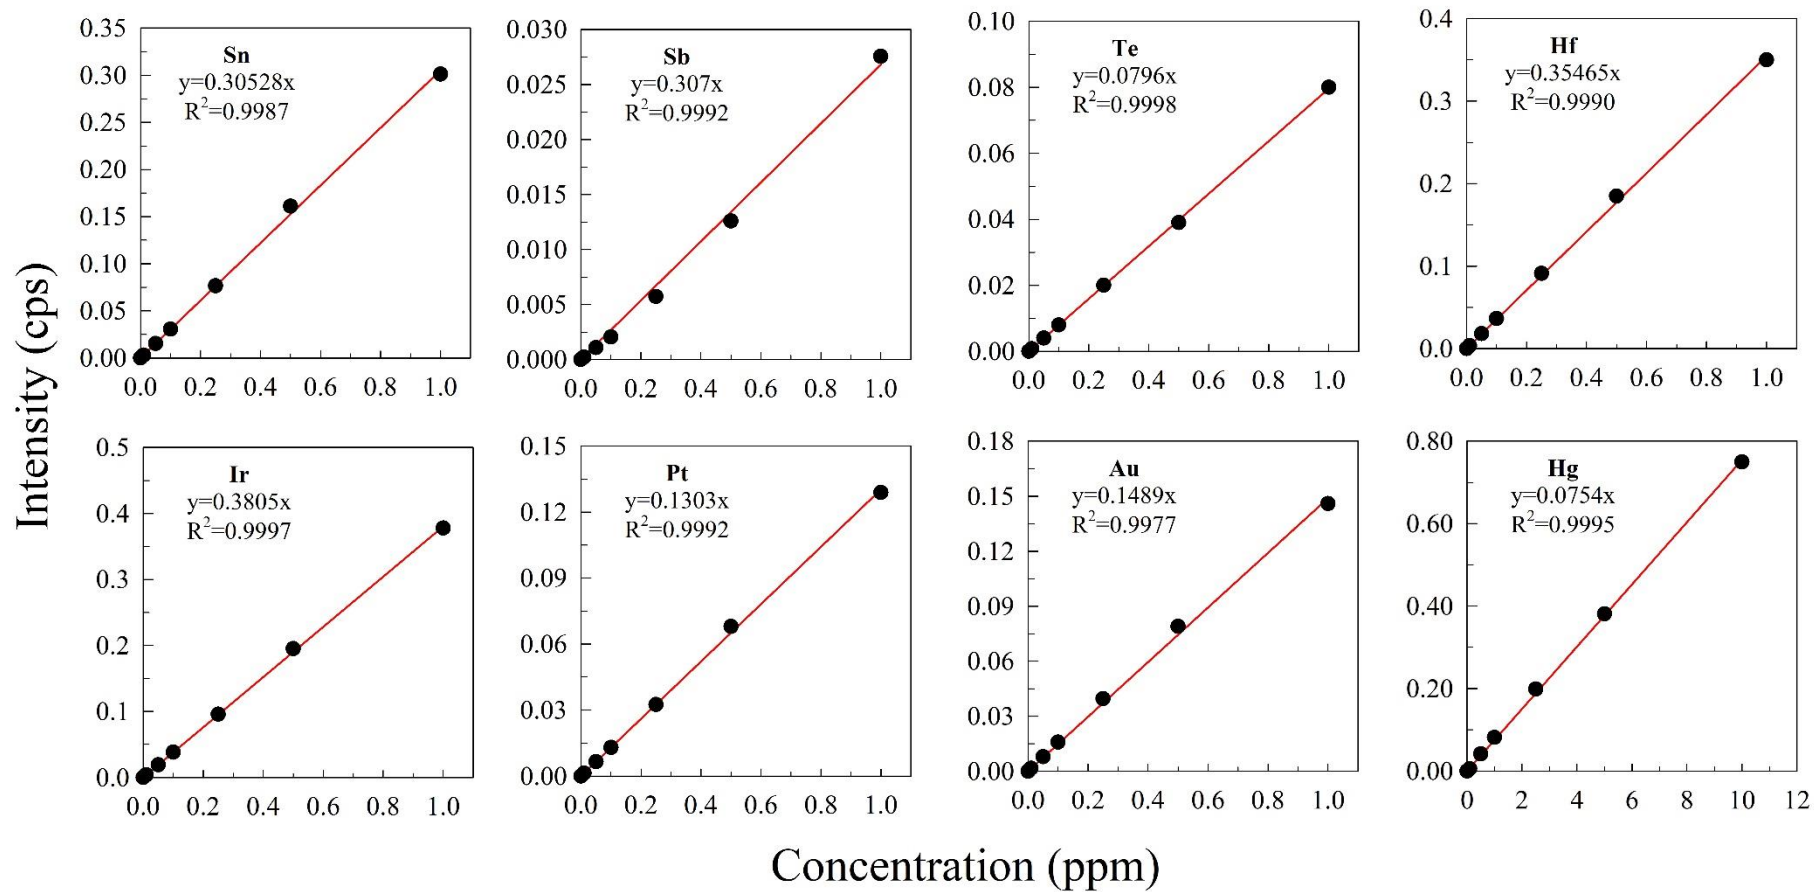

Figure S5. Calibration curves for individual elements (Sn, Sb, Te, Hf, Ir, Pt, Au, Hg) measured by ICP-MS with solution-based calibration (standard additions mode).

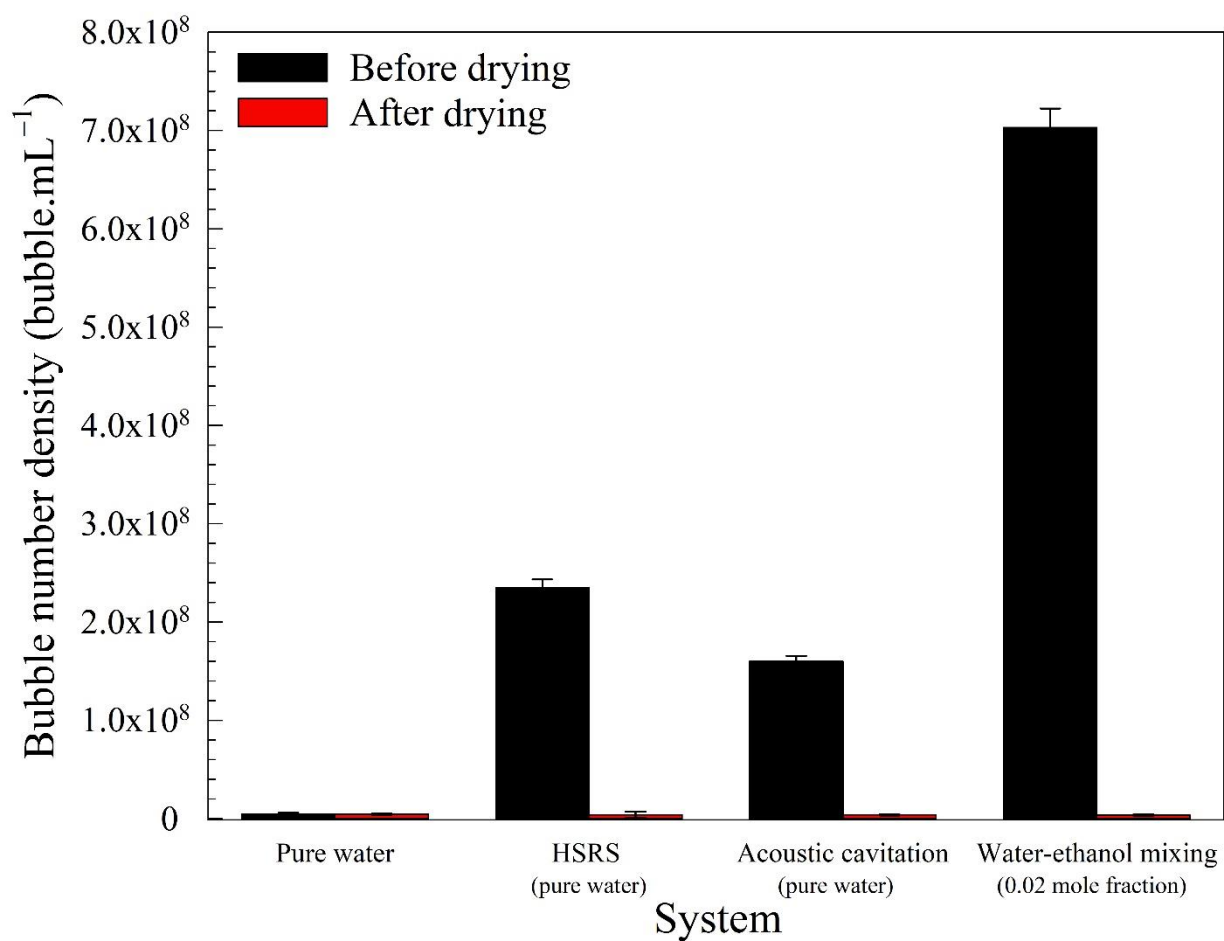

Figure S6. Bubble number density before and after complete evaporation of pure water and of nanobubble suspensions.

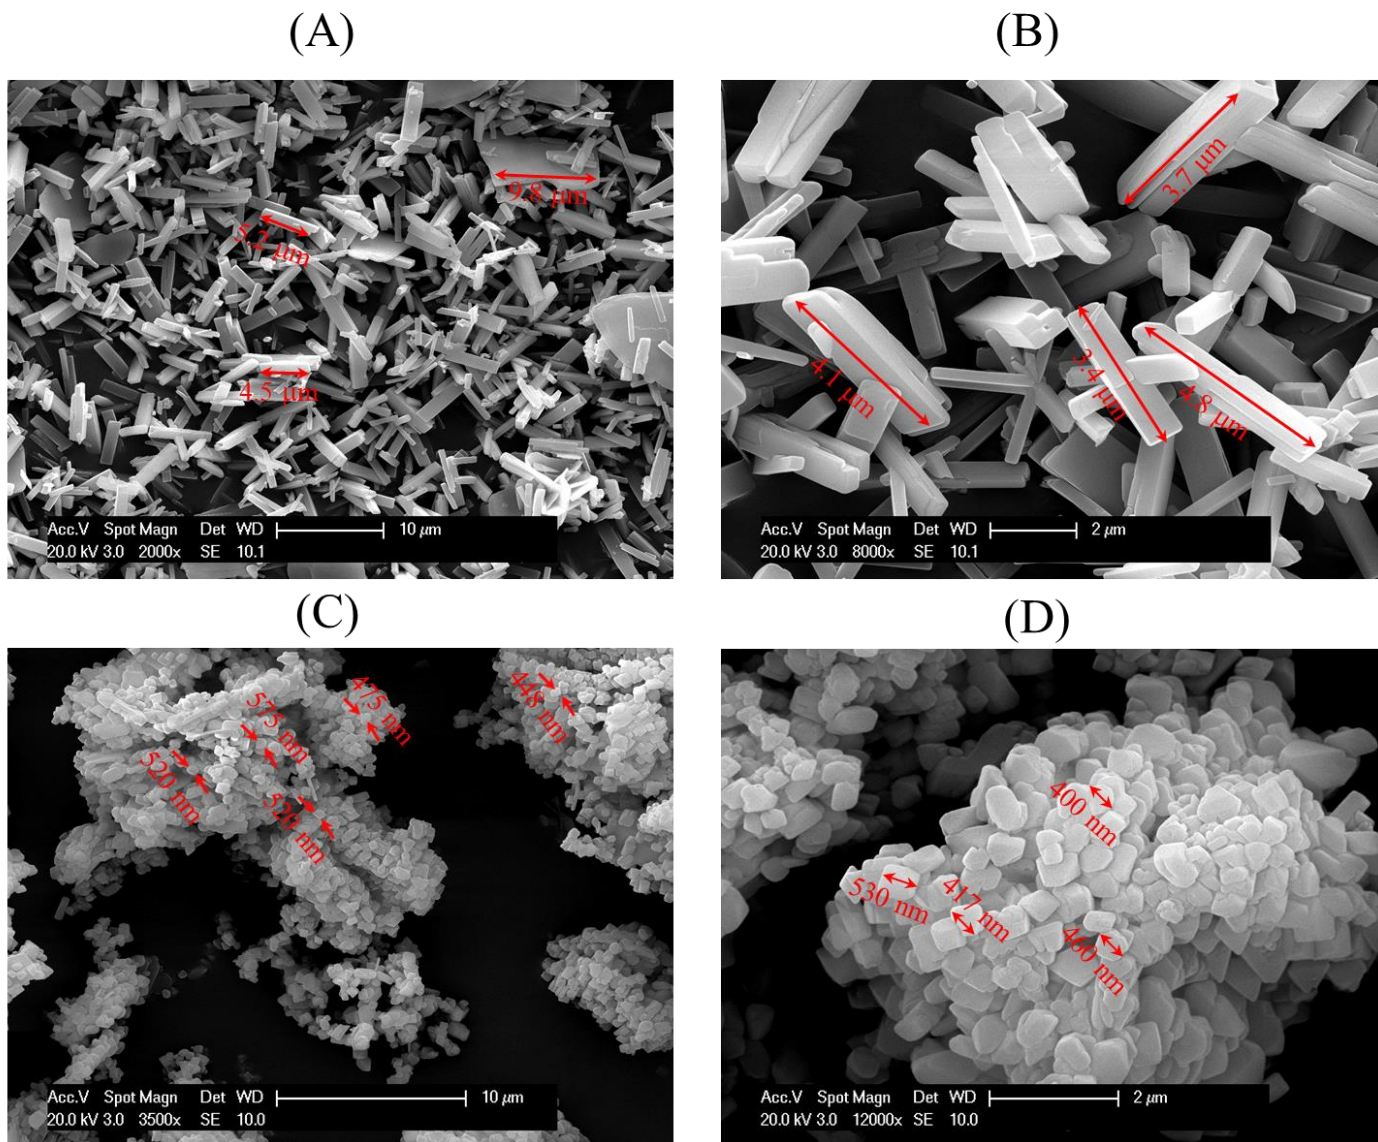

Figure S7. SEM micrographs of zinc phosphate nanoparticles prepared in pure water at magnifications of (A) 2000, (B) 8000; and prepared in nanobubble suspension at magnifications of (C) 3500, (D) 12000.



Table S1. GC-MS operating parameters.

| Gas chromatography        |                                                             |
|---------------------------|-------------------------------------------------------------|
| Instrument                | 7809A (Agilent)                                             |
| Column                    | ZB-WAX 30 m × $\phi$ 0.25 mm, 0.25 $\mu$ m (Phenomenex, UK) |
| Injection method          | Split (1:10)                                                |
| Injection volume          | 1 $\mu$ L                                                   |
| Carrier gas               | Helium                                                      |
| Flow rate                 | 1 mL.min <sup>-1</sup>                                      |
| Injection temperature     | 250 °C                                                      |
| Oven temperature program  | 50 °C (2 min) → 5 °C/min → 250 °C (18 min)                  |
| Transfer line temperature | 250 °C                                                      |
| Mass spectrometry         |                                                             |
| Instrument                | GCT Premier (Waters, UK)                                    |
| Mode                      | Selected-ion monitoring                                     |
| Ion source temperature    | 250 °C                                                      |
| Ionization mode           | Electron impact (EI <sup>+</sup> )                          |
| Electron energy           | 70 eV                                                       |
| Trap current              | 100 $\mu$ A                                                 |
| Emission current          | 179 $\mu$ A                                                 |

Table S2. ICP-MS operating parameters.

---

| Parameter                       | Value                    |
|---------------------------------|--------------------------|
| RF applied power (kW)           | 1.6 kW                   |
| Auxiliary gas flow rate (Argon) | 1.2 L.min <sup>-1</sup>  |
| Plasma gas flow (Argon)         | 18 L.min <sup>-1</sup>   |
| Nebulizer gas flow (Argon)      | 0.95 L.min <sup>-1</sup> |
| Sample flow rate                | 0.3 mL.min <sup>-1</sup> |
| KED Gas Flow (Helium)           | 4 mL.min <sup>-1</sup>   |
| Nebulizer type                  | Sea Spray concentric     |
| Interface cone material         | Nickel                   |
| Analog stage voltage            | -1675                    |
| Pulse stage voltage             | 1050 V                   |
| Discriminator threshold         | 12 mV                    |
| Deflector voltage               | - 10 V                   |
| Quadrupole rod offset           | - 12 V                   |
| Cell entrance voltage           | - 9 V                    |
| Cell exit voltage               | - 20 V                   |
| Cell rod offset                 | - 15 V                   |
| Axial field voltage             | 475 V                    |

---

Table S3. Concentrations (ppm) of elements in pure water and in nanobubble suspensions measured by ICP-MS.

| Elements | System     |                      |                                     |                                         |
|----------|------------|----------------------|-------------------------------------|-----------------------------------------|
|          | Pure water | HSRS<br>(pure water) | Acoustic cavitation<br>(pure water) | Water + ethanol<br>(0.02 mole fraction) |
| Na       | 0.0017213  | 0.0064366            | 0.0019421                           | 0.0013771                               |
| Mg       | 0.0034085  | 0.0069099            | 0.0070269                           | 0.0027268                               |
| Al       | 0.0014944  | 0.0103592            | 0.0269015                           | 0.0011955                               |
| Si       | 0.0066192  | 0.0688691            | 0.0370155                           | 0.0052953                               |
| P        | 0.0001872  | 0.0025428            | 0.0022671                           | 0.0001497                               |
| K        | 0.0008307  | 0.0011169            | 0.0073439                           | 0.0006646                               |
| Ca       | 0.0019513  | 0.0153653            | 0.0887717                           | 0.0015610                               |
| Ti       | 0.0000229  | 0.0001009            | 0.0011559                           | 0.0000183                               |
| V        | 0.0001358  | 0.0000509            | 0.0000707                           | 0.0001087                               |
| Cr       | 0.0000105  | 0.0007605            | 0.0000204                           | 0.0000084                               |
| Mn       | 0.0000425  | 0.0000731            | 0.0000683                           | 0.0000340                               |
| Fe       | 0.0046523  | 0.0399060            | 0.0047178                           | 0.0037218                               |
| Co       | 0.0004052  | 0.0001857            | 0.0001852                           | 0.0003241                               |
| Ni       | 0.0001134  | 0.0001255            | 0.0008461                           | 0.0000907                               |
| Cu       | 0.0000095  | 0.0000798            | 0.0000169                           | 0.0000076                               |
| Zn       | 0.0002072  | 0.0005225            | 0.0031254                           | 0.0001658                               |
| Rb       | 0.0001465  | 0.0009641            | 0.0000610                           | 0.0001172                               |
| Sr       | 0.0001693  | 0.0012837            | 0.0081181                           | 0.0027658                               |
| Zr       | 0.0001646  | 0.0000561            | 0.0000836                           | 0.0001317                               |
| Ru       | 0.0000003  | 0.0000010            | 0.0000000                           | 0.0000002                               |
| Rh       | 0.0000619  | 0.0000760            | 0.0000688                           | 0.0000495                               |
| Pd       | 0.0000001  | 0.0000058            | 0.0000018                           | 0.0000001                               |
| Ag       | 0.0000613  | 0.0001217            | 0.0001172                           | 0.0000490                               |
| Cd       | 0.0002498  | 0.0005485            | 0.0002731                           | 0.0001998                               |
| Sn       | 0.0000327  | 0.0007936            | 0.0001225                           | 0.0000262                               |
| Sb       | 0.0000043  | 0.0002214            | 0.0000721                           | 0.0000034                               |
| Te       | 0.0000058  | 0.0000043            | 0.0000024                           | 0.0000046                               |
| Hf       | 0.0000006  | 0.0000045            | 0.0000023                           | 0.0000005                               |
| Ir       | 0.0000021  | 0.0000066            | 0.0000031                           | 0.0000017                               |
| Pt       | 0.0000072  | 0.0000375            | 0.0000102                           | 0.0000058                               |
| Au       | 0.0000018  | 0.0000078            | 0.0000011                           | 0.0000015                               |
| Hg       | 0.0370392  | 0.0330910            | 0.0245242                           | 0.0296314                               |
